# Supplementary material
Source: MDPI journal article supplement (https://www.mdpi.com/2071-1050/14/16/10352)
Supplement: s1 [file s1]

## Supplementary Information

**Table S1** – Results obtained from leachate preparation, regarding particle size as well as pH and EC of the leachates.

| Parameter                                              | A1  | A2  | A3  | A4   | A5   | A6  |
|--------------------------------------------------------|-----|-----|-----|------|------|-----|
| Percentage of the sample with particle size > 4 mm (%) | 40  | 50  | 50  | 25   | 15   | 31  |
| Percentage of non-crushable material in the sample (%) | 0   | 0   | 0   | 0    | 0    | 0   |
| Leachate pH                                            | 9   | 9.5 | 9.1 | 8.1  | 9.5  | 7.7 |
| Leachate EC <sup>a</sup> (µS / cm)                     | 328 | 497 | 325 | 1.95 | 1.37 | 314 |

<sup>a</sup>EC – Electrical conductivity

**Table S2** – Grading of skin reactions (erythema and eschar formation, and oedema formation) according to OECD guideline 404.

| Erythema and Eschar Formation                                                     | Score | Oedema Formation                                                                | Score |
|-----------------------------------------------------------------------------------|-------|---------------------------------------------------------------------------------|-------|
| No erythema                                                                       | 0     | No oedema                                                                       | 0     |
| Very slight erythema (barely perceptible)                                         | 1     | Very slight oedema (barely perceptible)                                         | 1     |
| Well defined erythema                                                             | 2     | Slight oedema (edges of the area well defined by definite raising)              | 2     |
| Moderate to severe erythema                                                       | 3     | Moderate oedema (raised approx. 1 mm)                                           | 3     |
| Severe erythema (beef redness) to eschar formation preventing grading of erythema | 4     | Severe oedema (raised more than 1 mm and extending beyond the area of exposure) | 4     |

**Table S3** - Results of the physical and chemical parameters analyzed for IBA samples (A1 to A6). Concentration of chemical elements expressed in mg/kg.

| Parameters               | Uncertainty | A1 <sup>a</sup> | A2 <sup>b</sup> | A3 <sup>c</sup> | A5 <sup>d</sup> | A4 <sup>e</sup> | A6 <sup>f</sup> | Literature <sup>g</sup>                                     |
|--------------------------|-------------|-----------------|-----------------|-----------------|-----------------|-----------------|-----------------|-------------------------------------------------------------|
| pH                       | ±0.2        | 9.7             | 9.2             | 9.0             | 9.8             | 11.6            | 10.4            | Fresh: 10-13 <sup>h</sup> ;<br>Weathered: 8-10 <sup>i</sup> |
| Moisture (%)             | ±10         | 14.2            | 16.5            | 15.8            | 24.4            | 27.4            | 14.0            | 7% - 30% <sup>j</sup>                                       |
| As (mg/kg)               | ±37         | <10             | <10             | <10             | <10             | <10             | <10             | 0.12 - 190                                                  |
| Be (mg/kg)               | ±14         | <4              | <4              | <4              | <4              | <4              | <4              | 0.8 - 6                                                     |
| Cd (mg/kg)               | ±13         | <2.0            | 3.0             | 3.6             | 4.2             | 115             | 3.0             | 0.3 - 146                                                   |
| Co (mg/kg)               | ±19         | <4              | 17              | 8               | 13              | 20              | 8               | 6 - 350                                                     |
| Cr (mg/kg)               | ± 13        | 47              | 49              | 40              | 29              | 27              | 21              | 20 - 3,400                                                  |
| Cu (mg/kg)               | ±12         | 2151            | 3267            | 525             | 1289            | 688             | 19              | 190 – 25,000                                                |
| Hg (mg/kg)               | ±20         | <0.20           | <0.20           | <0.20           | <0.20           | <0.20           | <0.20           | 0.02 - 7.75                                                 |
| Mo (mg/kg)               | ±28         | <4              | <4              | <4              | 2               | <1              | <1              | 2.5 - 280                                                   |
| Ni (mg/kg)               | ±13         | 34              | 23              | 28              | 19              | 18              | 40              | 7 - 4300                                                    |
| Pb (mg/kg)               | ±12         | 894             | 433             | 313             | 334             | 590             | 3569            | 75 - 14,000                                                 |
| Sb (mg/kg)               | ±18         | <10             | <10             | <10             | <10             | <10             | 38              | 7.6 - 432                                                   |
| Se (mg/kg)               | ±18         | <10             | <10             | <10             | <10             | <10             | <10             | 0.05-10.0                                                   |
| Sn (mg/kg)               | ±16         | <4              | <4              | <4              | 54              | 39              | <4              | 2 - 960                                                     |
| Te (mg/kg)               | ±15         | <4              | <4              | <4              | <4              | <4              | <4              | 0.208                                                       |
| Tl (mg/kg)               | ±12         | <4              | <4              | <4              | <4              | <4              | <4              | 0.0077-0.23                                                 |
| Zn (mg/kg)               | ±13         | 2454            | 2501            | 2213            | 2279            | 2932            | 1410            | 10-20,000                                                   |
| PAH (µm/kg)              | ±39         | <160            | <160            | <160            | 426             | 237             | <160            | 13 - 2,190                                                  |
| Total Organic Carbon (%) | ±14         | -               | -               | -               | 2.40            | 0.22            | 0.26            | <1-4                                                        |

<sup>a</sup> less than 3-month weathering (<20 mm); <sup>b</sup> 3-month weathered (<20 mm); <sup>c</sup> more than 3-month weathering; <sup>d</sup> more than 3-month weathering; <sup>e</sup> fresh IBA (1 day); <sup>f</sup> more than 3-month weathering (<20 mm); <sup>g</sup> [33,35–48]; <sup>h</sup> [16,49]; <sup>i</sup> [14,15]; <sup>j</sup> [20,21,50,51]

**Table S4** - Immobilisation of *Daphnia magna* (mean ± standard deviation) after 48h exposure to different concentrations of IBA leachates.

| Concentration | Immobilisation (%) |        |         |         |        |        |
|---------------|--------------------|--------|---------|---------|--------|--------|
|               | A1                 | A2     | A3      | A4      | A5     | A6     |
| Control       | 0 ± 0              | 0 ± 0  | 0 ± 0   | 0 ± 0   | 0 ± 0  | 0 ± 0  |
| 1%            | 0 ± 0              | 0 ± 0  | 5 ± 10  | 0 ± 0   | 0 ± 0  | 0 ± 0  |
| 2%            | 0 ± 0              | 0 ± 0  | 40 ± 0  | 0 ± 0   | 0 ± 0  | 0 ± 0  |
| 4%            | 0 ± 0              | 0 ± 0  | 40 ± 0  | 20 ± 16 | 0 ± 0  | 0 ± 0  |
| 8%            | 5 ± 10             | 0 ± 0  | 45 ± 10 | 45 ± 10 | 5 ± 10 | 0 ± 0  |
| 16%           | 15 ± 10            | 5 ± 10 | 45 ± 10 | 45 ± 10 | 20 ± 0 | 5 ± 10 |
